# Supplementary material for: Preparation of Anti-Aristolochic Acid I Monoclonal Antibody and Development of Chemiluminescent Immunoassay and Carbon Dot-Based Fluoroimmunoassay for Sensitive Detection of Aristolochic Acid I
Source: MDPI journal article supplement (doi:10.3390/foods10112647), 2021-11-01
Supplement: s1 [file s1]

# Supplementary Materials

## Preparation of Anti-Aristolochic Acid I Monoclonal Antibody and Development of Chemiluminescent Immunoassay and Carbon Dot-Based Fluoroimmunoassay for Sensitive Detection of Aristolochic Acid I

Ai-Fen Ou<sup>1,2</sup>, Zi-Jian Chen<sup>3</sup>, Yi-Feng Zhang<sup>3</sup>, Qi-Yi He<sup>1</sup>, Zhen-Lin Xu<sup>3</sup>, Su-Qing Zhao<sup>1,\*</sup>

1 Department of Pharmaceutical Engineering, School of Biomedical and Pharmaceutical Sciences, Guangdong University of Technology, Guangzhou 510006, China; ouaifen@gcp.edu.cn (A.-F.O.); chesto36@163.com (Q.-Y.H.)

2 Department of Food, Guangzhou City Polytechnic, Guangzhou 510006, China

3 Guangdong Provincial Key Laboratory of Food Quality and Safety/Guangdong Laboratory of Lingnan Modern Agriculture, South China Agricultural University, Guangzhou 510642, China; guangdongchenzj@163.com (Z.-J.C.); zhyifengscau@163.com (Y.-F.Z.); jallent@163.com (Z.-L.X.)

\* Correspondence: sqzhao@gdut.edu.cn

**Synthesis of immunogens and coating antigens.** AA-I was conjugated to BSA or KLH as immunogen and was conjugated to OVA for coating antigens using the active ester method. Briefly, AA-I (0.025 mmol), EDC (0.0375 mmol) and NHS (0.0375 mmol) were dissolved by 0.6 mL of DMF and stirred at for 4 h. Then the mixture was added to 50 mg protein (dissolved in 5 mL 50 mM pH 9.6 carbonate Buffer) and adjusted pH to 9.6 by 3 M NaOH. The solution and stirred overnight. Then the solution was dialyzed by 0.01 M PBS (5 L) for 3 days, and finally stored at -20 °C until use. UV-vis spectral data was used to confirm the structure of the final conjugates (Figure S2).

**Synthesis of rCDs preparation.** One gram of citric acid and 2 g of urea were dissolved in 10 mL DMF and then the mixture was heated to 160 °C for 6 hours. The obtained dark red product was mixed with 20 mL NaOH (50 mg/mL), and then centrifuged 10 min at 14000 rpm (18407×g). The precipitate was dissolved with 10 mL ultrapure water and centrifuged again to remove residual salts. Finally, the rCDs was resuspended with 10 mL ultrapure water.

## Results of ethical review of animal experiments

No: 2019054

|                                                        |                                                                                                                                                                                   |              |             |            |
|--------------------------------------------------------|-----------------------------------------------------------------------------------------------------------------------------------------------------------------------------------|--------------|-------------|------------|
| Experiment Item                                        | The preparation of monoclonal antibody for pesticides and their metabolite                                                                                                        |              |             |            |
| Application number                                     | 2019B054                                                                                                                                                                          |              |             |            |
| Comments on conservation of experimental animals       | All the experimental mice used in this experiment came from experimental animal centre legal license. The type, quantity and grouping of mice were conformed to the 3R principle. |              |             |            |
| Comments on welfare assessment of experimental animals | This experiment was carried out in a laboratory with a license for experiment animal, which was conformed to the welfare principle.                                               |              |             |            |
| Comments on ethical and moral                          | The animals were euthanized after the experiment.                                                                                                                                 |              |             |            |
| Comments on comprehensive scientific evaluation        | This experimental study has scientific significance.                                                                                                                              |              |             |            |
| Time of experiment animal type and quantity            | Date: 2019-05-15 to 2019-07-30.<br>Experimental animal: SPF BAL B/c female mice.<br>Quantity: 70.                                                                                 |              |             |            |
| Comments of ethical reviewer                           | Agree                                                                                                                                                                             |              |             |            |
|                                                        | Reviewer                                                                                                                                                                          | Zhonghua Liu | Review Date | 2019-05-08 |
| Comments of ethical reviewer                           | Agree                                                                                                                                                                             |              |             |            |
|                                                        | Reviewer                                                                                                                                                                          | Wei Huang    | Review Date | 2019-05-08 |
| Final comments of director (or deputy director)        | Agree                                                                                                                                                                             |              |             |            |
|                                                        | Reviewer                                                                                                                                                                          | Ming Liao    | Review Date | 2019-05-08 |

Experimental Animal Ethics Committee of  
South China Agricultural University  
Date 2019-05-08

**Figure S1.** Ethical review of animal experiments

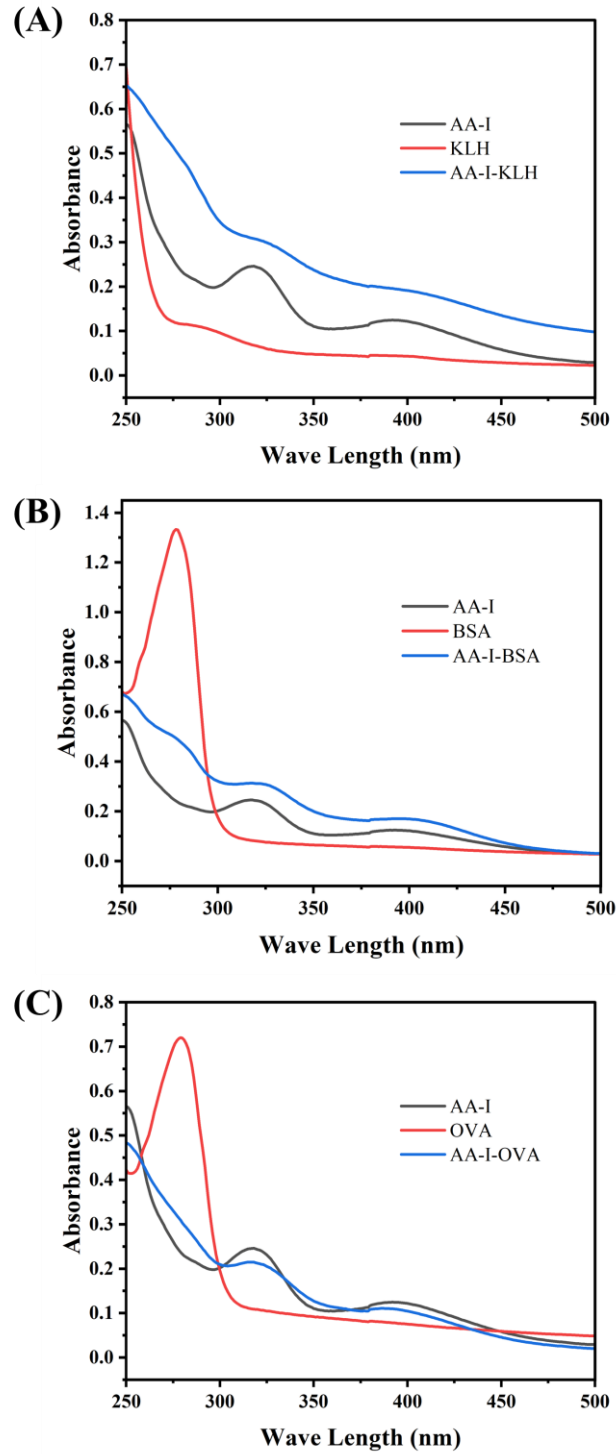

**Figure S2.** Ultraviolet scanning of synthesized antigens of AA-I (A) Ultraviolet spectrum of AA-I, KLH and AA-I-KLH; (B) AA-I, BSA and AA-I-BSA; (C) AA-I, OVA and AA-I-OVA.

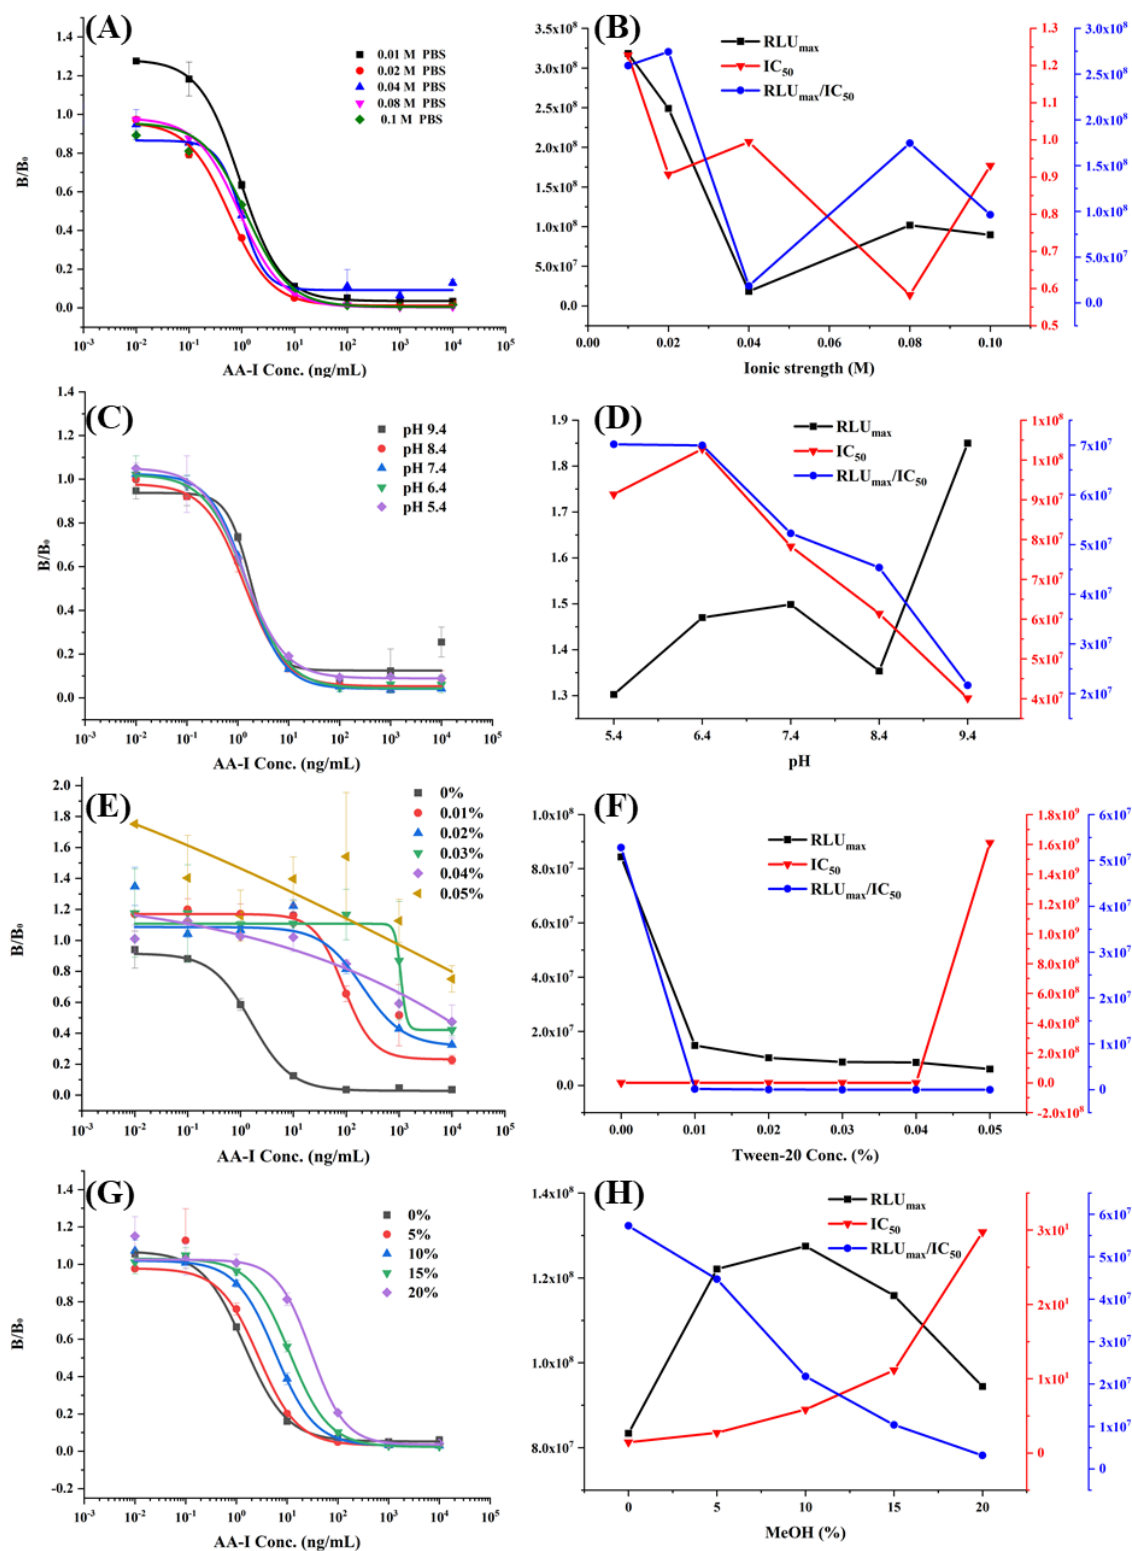

**Figure S3.** The optimizing of (A, B) Ionic strength; (C, D) pH value; (E, F) Tween-20 concentration; (G, H) Methanol concentration.

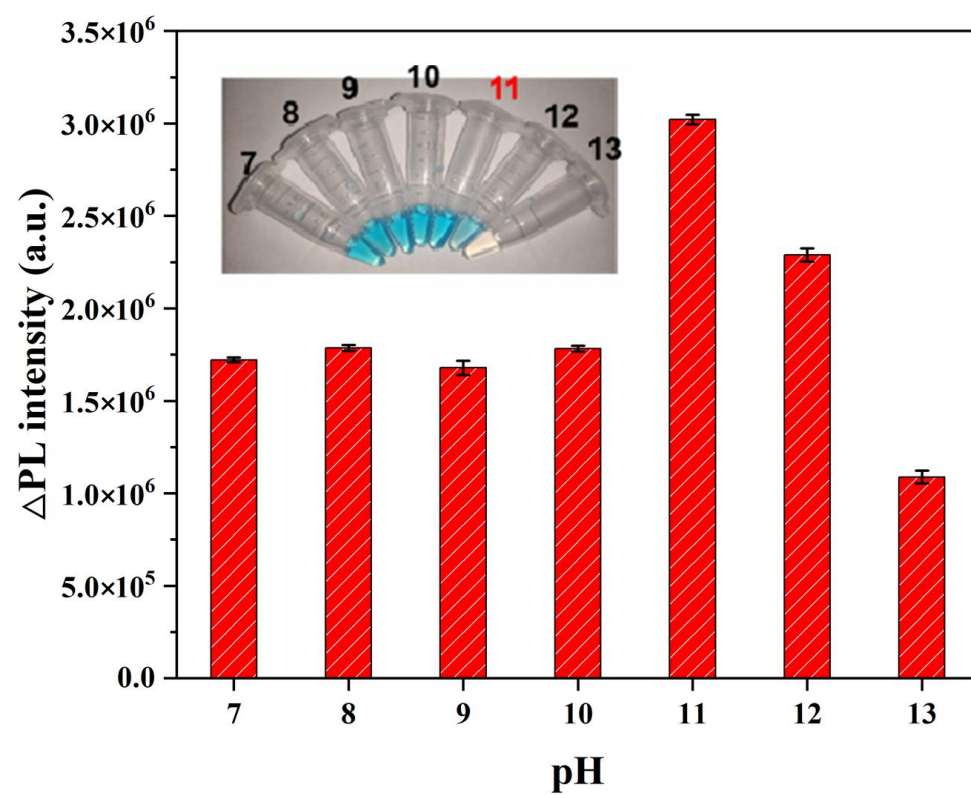

**Figure S4.** The optimizing of pH for rCDs.

**Table S1** Parameters of UPLC-QQQ-MS/MS

| Item                        | Parameters                         |
|-----------------------------|------------------------------------|
| Ion source                  | Electrospray ionization (ESI+)     |
| Detection mode              | multiple reaction monitoring (MRM) |
| Scanning mode               | Positron mode                      |
| Curtain Gas                 | 30 $\mu$ L/min                     |
| ionizing voltage            | 5500V                              |
| Ion source temperature      | 550 °C                             |
| Retention time              | 4.26 min                           |
| Parent ion ( <i>m/z</i> )   | 359.100 [M+H] <sup>+</sup>         |
| Daughter ion ( <i>m/z</i> ) | 298.100 <sup>1</sup>               |
| Declustering potential      | 65V                                |
| Collision Energy            | 16eV                               |

<sup>1</sup>Quantification ion pair

**Table S2** Cell lines evaluation (n=3)

| Cell clonal image                                                                   | Cell clonal number | IC <sub>50</sub> (ng/mL) <sup>1</sup> |
|-------------------------------------------------------------------------------------|--------------------|---------------------------------------|
| 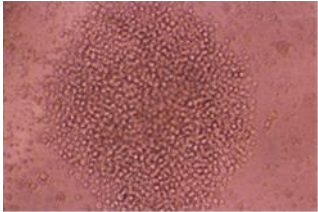   | 3A3                | 11.3±1.7                              |
|    | 5C12               | 19.2±1.4                              |
|   | 1H7                | 32.5±3.2                              |
|  | 1B4                | 22.7±4                                |
|  | 7G6                | 30.2±4.3                              |
|  | 4B1                | 25.6±3.7                              |

<sup>1</sup> The concentration of coating antigen was 1 µg/mL.



**Table S3** Optimization of coating antigen concentration (n=3)

| Coating antigen concentration (μg/mL) | mAb concentration (ng/mL) | RLU <sub>0</sub> (mean±SD <sup>1</sup> ) | RLU <sup>2</sup>   | Inhibition <sup>3</sup> (%) |
|---------------------------------------|---------------------------|------------------------------------------|--------------------|-----------------------------|
| 2                                     | 1000                      | 384970580±5310223                        | 388682380±13355825 | -1                          |
|                                       | 500                       | 154411557±11373230                       | 151221537±1212134  | 2.1                         |
|                                       | 250                       | 458939515±57755509                       | 69235764±697191    | 84.9 <sup>4</sup>           |
|                                       | 125                       | 198831376±22622577                       | 32214033±2866292   | 83.8                        |
| 1                                     | 1000                      | 268208914±25985236                       | 47788119±637271    | 82.2                        |
|                                       | 500                       | 128413594±464195                         | 20315647±1694822   | 84.2                        |
|                                       | 250                       | 61572049±8845561                         | 20628542±2588584   | 66.5                        |
|                                       | 125                       | 37050641±7523820                         | 16283822±1275431   | 56                          |
| 0.5                                   | 1000                      | 221422515±18848038                       | 35112256±225114    | 84.1                        |
|                                       | 500                       | 137213144±6674755                        | 24112574±2570426   | 82.4                        |
|                                       | 250                       | 78199741±21590849                        | 22024911±9894031   | 71.8                        |
|                                       | 125                       | 29837089±5007276                         | 14996433±1773348   | 49.7                        |
| 0.25                                  | 1000                      | 41759552±8255673                         | 7287115±1253298    | 82.5                        |
|                                       | 500                       | 21875743±629344                          | 5264211±974094     | 75.9                        |
|                                       | 250                       | 10716646±119017                          | 6962599±1272932    | 35                          |
|                                       | 125                       | 5020236±465055                           | 4306175±807786     | 14.2                        |

<sup>1</sup> SD, standard deviation;<sup>2</sup> RLU was measure with 1 ng/mL of AA-I;<sup>3</sup> Inhibition =  $(1 - \text{RLU} / \text{RLU}_0) \times 100\%$ ;<sup>4</sup> The coating antigen concentration performed the highest inhibition was chosen as the optimized condition.
